# Supplementary material for: Sorption of carbendazim on activated carbons derived from rape straw and its mechanism
Source: Royal Society of Chemistry journal article supplement (doi:10.1039/c9ra06495h), 2019-01-01
Supplement: c9ra06495h1.pdf [file c9ra06495h1.pdf]

## **Sorption of Carbendazim to Activated Carbons Derived from Rape Straw and its Mechanism**

Tao Wang <sup>a,b</sup>, Zhen Zhang <sup>a</sup>, Huixue Zhang <sup>a</sup>, Xiaoxiao Zhong <sup>a</sup>, Yonghong Liu <sup>a\*</sup>,  
Shuijiao Liao <sup>a</sup>, Xiali Yue <sup>a</sup>, Guangsheng Zhou <sup>c</sup>

<sup>a</sup> College of Science, Huazhong Agricultural University, Wuhan, 430070, China

<sup>b</sup> Institute of Hydrobiology, Chinese Academy of Sciences, Wuhan, 430072, China

<sup>c</sup> College of Plant Science and Technology, Huazhong Agricultural University,  
Wuhan, 430070, China

\* Corresponding author: Tele/Fax No: 0086 15827001139

E-mail: liuyh913@mail.hzau.edu.cn

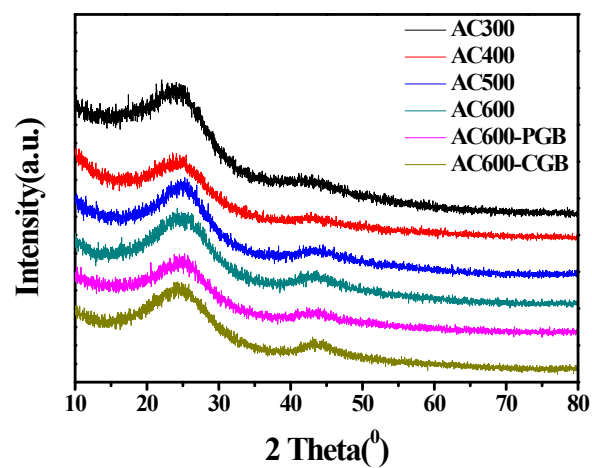

Fig. S1. XRD profiles of the samples

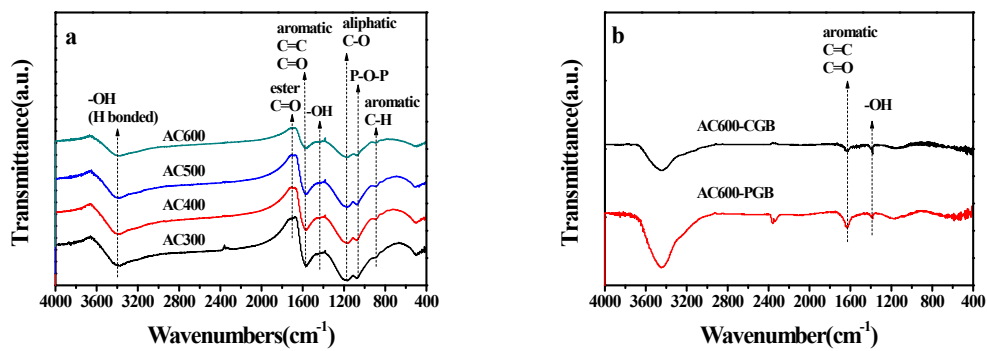

Fig. S2. FTIR spectra of the samples

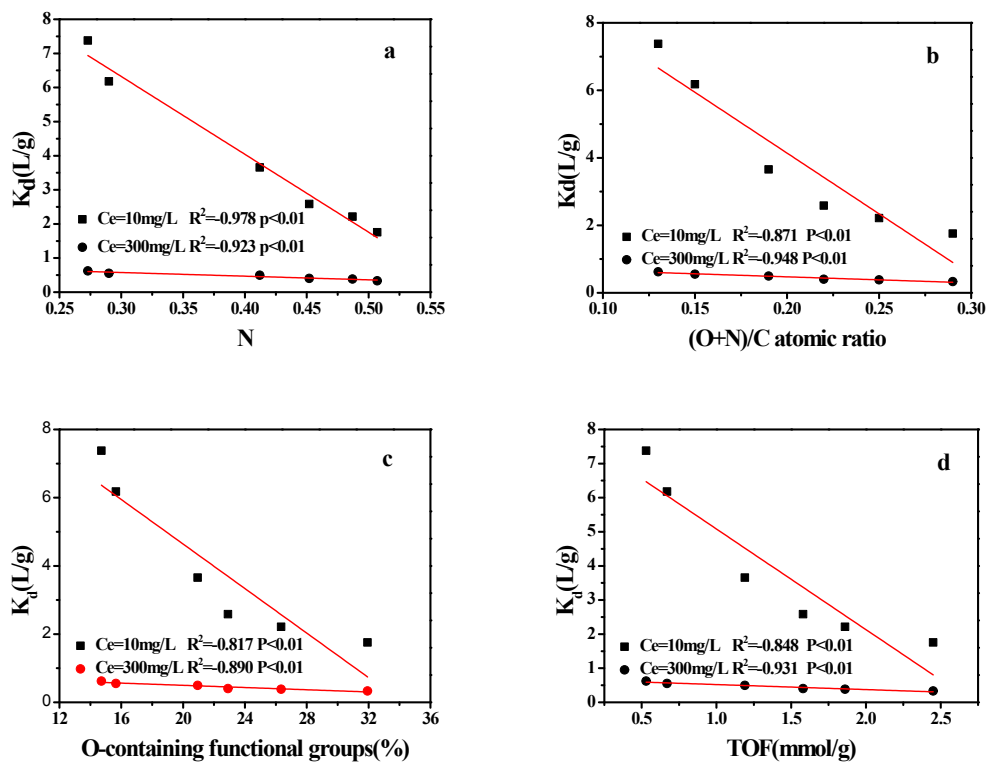

**Fig. S3.** Correlations between sorption coefficient ( $K_d$ ) at different CBD concentrations and (a) nonlinearity, (b) polarity index (O+N)/C, (c) the relative contents of the O-containing functional groups determined by C1s XPS spectra, (d) the total O-containing functional groups by Boehm's titration. The correlations were analyzed by Pearson test (two-tailed) using SPSS 18.0.

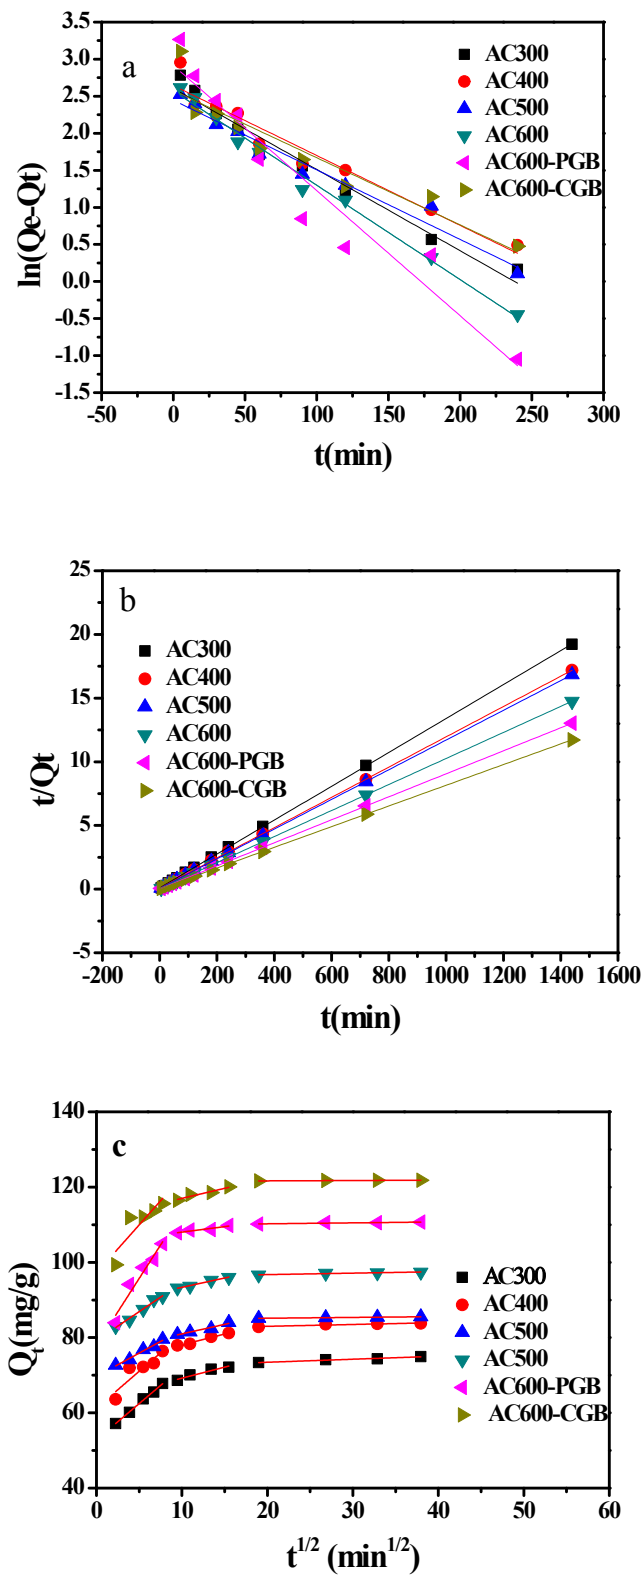

**Fig. S4.** Pseudo-first-order kinetic model (a), Pseudo-second-order kinetic model (b) and Particle diffusion equation (c) for CBD onto the samples (temperature =  $20 \pm 0.5^\circ\text{C}$ ; initial pH =  $7.00 \pm 0.10$ ; time =  $360 \pm 5$  min)

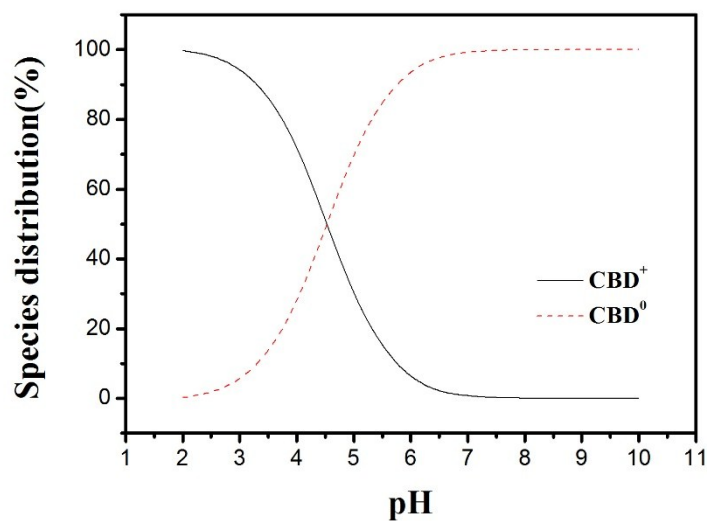

Fig. S5. Solution speciation of CBD as a function of pH

Table S1 Textural properties of the samples

| Samples   | $S_{\text{BET}}(\text{m}^2/\text{g})$ | $S_{\text{mic}}(\text{m}^2/\text{g})$ | $S_{\text{ext}}(\text{m}^2/\text{g})$ | $V_{\text{tot}}(\text{cm}^3/\text{g})$ | $V_{\text{mic}}(\text{cm}^3/\text{g})$ | $V_{\text{ext}}(\text{cm}^3/\text{g})$ | $D_p(\text{nm})$ |
|-----------|---------------------------------------|---------------------------------------|---------------------------------------|----------------------------------------|----------------------------------------|----------------------------------------|------------------|
| AC300     | 951                                   | 275                                   | 676                                   | 0.47                                   | 0.14                                   | 0.33                                   | 3.70             |
| AC400     | 1490                                  | 35                                    | 1455                                  | 1.40                                   | 0.02                                   | 1.38                                   | 4.75             |
| AC500     | 1164                                  | 75                                    | 1089                                  | 1.17                                   | 0.04                                   | 1.13                                   | 4.58             |
| AC600     | 1053                                  | 79                                    | 974                                   | 1.06                                   | 0.04                                   | 1.02                                   | 4.18             |
| AC600-PGB | 1122                                  | 89                                    | 1033                                  | 1.08                                   | 0.05                                   | 1.03                                   | 4.16             |
| AC600-CGB | 1120                                  | 90                                    | 1030                                  | 0.99                                   | 0.04                                   | 0.95                                   | 4.69             |

Table S2 Estimated kinetic model constants for the sorption of CBD onto the samples

| Model                  | Parameter                              | Adsorbent |        |        |        |               |               |
|------------------------|----------------------------------------|-----------|--------|--------|--------|---------------|---------------|
|                        |                                        | AC300     | AC400  | AC500  | AC600  | AC600<br>-PGB | AC600<br>-CGB |
| pseudo-<br>first-order | $Q_{e,\text{exp}}(\text{mg}/\text{g})$ | 13.57     | 14.06  | 11.54  | 13.10  | 18.46         | 13.16         |
|                        | $Q_{e,\text{cal}}(\text{mg}/\text{g})$ | 73.33     | 82.33  | 85.12  | 96.64  | 110.14        | 121.64        |
|                        | $K_1(1/\text{min})$                    | 0.0110    | 0.0094 | 0.0094 | 0.0127 | 0.0169        | 0.0097        |
|                        | $R^2$                                  | 0.9656    | 0.9409 | 0.9623 | 0.9890 | 0.9260        | 0.8734        |

|                          |                                 |        |        |        |        |        |        |
|--------------------------|---------------------------------|--------|--------|--------|--------|--------|--------|
|                          | $Q_{e,exp}(mg/g)$               | 75.02  | 84.10  | 85.76  | 97.56  | 110.86 | 122.10 |
|                          | $Q_{e,cal}(mg/g)$               | 73.33  | 82.33  | 85.12  | 96.64  | 110.14 | 121.64 |
| pseudo-second-order      | $K_2(g/(mg\min)10^{-3})$        | 1.9616 | 2.0119 | 2.7397 | 2.8576 | 3.0749 | 2.6636 |
|                          | $h(mg/(g\min))$                 | 11.04  | 14.23  | 20.15  | 27.19  | 37.79  | 39.71  |
|                          | $R^2$                           | 0.9999 | 0.9999 | 0.9999 | 0.9999 | 0.9999 | 0.9999 |
|                          | $K_{p1}(mg/g\min^{1/2}10^{-3})$ | 1.9278 | 1.9617 | 1.2411 | 1.5397 | 3.5510 | 2.5550 |
|                          | $C_1$                           | 52.83  | 61.24  | 69.68  | 79.20  | 77.98  | 91.19  |
|                          | $(R_1)^2$                       | 0.9964 | 0.7706 | 0.9761 | 0.9803 | 0.9354 | 0.6889 |
| intra-particle diffusion | $K_{p2}(mg/g\min^{1/2}10^{-3})$ | 0.5874 | 0.5739 | 0.5057 | 0.4966 | 0.2921 | 0.5344 |
|                          | $C_2$                           | 63.34  | 72.27  | 75.94  | 88.39  | 105.11 | 111.66 |
|                          | $(R_2)^2$                       | 0.9265 | 0.9743 | 0.9449 | 0.9739 | 0.8549 | 0.8969 |
|                          | $K_{p3}(mg/g\min^{1/2}10^{-3})$ | 0.0805 | 0.0487 | 0.0211 | 0.0387 | 0.0246 | 0.0091 |
|                          | $C_3$                           | 71.84  | 82.02  | 84.73  | 95.97  | 109.76 | 121.47 |
|                          | $(R_3)^2$                       | 0.9683 | 0.8277 | 0.9924 | 0.9030 | 0.6451 | 0.9849 |

**Table S3** Thermodynamic parameters of samples sorption on CBD

| Samples   | temperature (K) | $\Delta G$ (kJ/mol) | $\Delta H$ (kJ/mol) | $\Delta S$ (kJ/mol) |
|-----------|-----------------|---------------------|---------------------|---------------------|
| AC300     | 293             | -1.02               |                     |                     |
|           | 303             | -0.37               | -15.60              | -49.92              |
|           | 313             | -0.01               |                     |                     |
| AC400     | 293             | -1.54               |                     |                     |
|           | 303             | -1.08               | -16.48              | -50.88              |
|           | 313             | -0.52               |                     |                     |
| AC500     | 293             | -2.04               |                     |                     |
|           | 303             | -1.55               | -17.01              | -51.03              |
|           | 313             | -1.01               |                     |                     |
| AC600     | 293             | -3.37               |                     |                     |
|           | 303             | -3.06               | -11.59              | -28.07              |
|           | 313             | -2.80               |                     |                     |
| AC600-PGB | 293             | -6.34               |                     |                     |
|           | 303             | -5.86               | -20.44              | -48.07              |
|           | 313             | -5.37               |                     |                     |
| AC600-CGB | 293             | -7.60               |                     |                     |
|           | 303             | -7.01               | -20.36              | -43.67              |
|           | 313             | -6.71               |                     |                     |

**Table S4** Dual-mode model fitting results of CBD sorption on the samples

| Samples   | $Q^0$          | $a$   | $K_p$ | $R^2$ | $C_e=10$ mg/L |       | $C_e=300$ mg/L |       |
|-----------|----------------|-------|-------|-------|---------------|-------|----------------|-------|
|           |                |       |       |       | $Q_{ad}$      | $Q_p$ | $Q_{ad}$       | $Q_p$ |
| AC300     | $87.0 \pm 11$  | 0.023 | 0.016 | 0.993 | 16.3          | 0.16  | 83.4           | 4.8   |
| AC400     | $112.3 \pm 37$ | 0.018 | 0.019 | 0.980 | 17.1          | 0.19  | 106.4          | 5.7   |
| AC500     | $106.2 \pm 18$ | 0.026 | 0.023 | 0.988 | 21.9          | 0.23  | 102.3          | 6.9   |
| AC600     | $106.8 \pm 12$ | 0.057 | 0.072 | 0.985 | 38.8          | 0.72  | 105.0          | 21.6  |
| AC600-PGB | $99.6 \pm 12$  | 0.242 | 0.215 | 0.958 | 70.5          | 2.15  | 99.2           | 64.5  |
| AC600-CGB | $103.8 \pm 9$  | 0.739 | 0.273 | 0.962 | 91.4          | 2.73  | 103.7          | 81.9  |

**Text S1 Thermodynamic adsorption analysis**

The standard free energy change ( $\Delta G^0$ ) can be calculated from the following equation (S1):

$$\Delta G^0 = -RT \ln K^0 \quad (S1)$$

where R is the universal gas constant ( $8.314 \text{ J mol}^{-1}\text{K}^{-1}$ ), T is the temperature in Kelvin. The sorption equilibrium constant,  $K^0$ , can be calculated by plotting  $\ln K_d$  versus  $C_e$  and extrapolating  $C_e$  to zero. The standard enthalpy change ( $\Delta H^0$ ) and the standard entropy change ( $\Delta S^0$ ) are calculated from the following equation (S2):

$$\ln K^0 = \frac{\Delta S^0}{R} - \frac{\Delta H^0}{RT} \quad (S2)$$

The thermodynamic parameters are calculated from the plot of  $\ln K^0$  vs  $1/T$  using equations (S1) and (S2).
